# Supplementary material for: Inflammatory role of dendritic cells in Amyotrophic Lateral Sclerosis revealed by an analysis of patients’ peripheral blood
Source: PubMed Central journal article supplement (PMC5552769; doi:10.1038/s41598-017-08233-1), 2017-08-10
Supplement: 41598_2017_8233_MOESM1_ESM.pdf [file 41598_2017_8233_MOESM1_ESM.pdf]

## SUPPLEMENTARY MATERIALS

### **Inflammatory role of dendritic cells in Amyotrophic Lateral Sclerosis revealed by an analysis of patients' peripheral blood**

Michela Rusconi<sup>1</sup>, Francesca Gerardi<sup>2</sup>, William Santus<sup>1</sup>, Andrea Lizio<sup>2</sup>, Valeria Ada Sansone<sup>2,4</sup>, Christian Lunetta<sup>2</sup>, Ivan Zanoni<sup>1,3\*&</sup>, Francesca Granucci<sup>1\*&</sup>

<sup>1</sup> *Department of Biotechnology and Bioscience, University of Milano-Bicocca, Piazza della Scienza 2, 20126 Milan, Italy*

<sup>2</sup> *NEuroMuscolar Omnicentre, Fondazione Serena Onlus, Milano, Italy*

<sup>3</sup> *Harvard Medical School and Division of Gastroenterology, Boston Children's Hospital, Boston, MA 02115, USA*

<sup>4</sup> *Dept. Biomedical Sciences for Health, University of Milan, Milan, Italy.*

& equal contribution

\* corresponding authors:

Francesca Granucci,  
Department of Biotechnology and Biosciences, University of Milano-Bicocca, Piazza della Scienza 2 20126 Milan, Italy.  
Phone: +390264483553  
Fax: +390264483552  
e-mail: francesca.granucci@unimib.it

Ivan Zanoni,  
Division of Gastroenterology, Boston Children's Hospital, Enders Building 675, Longwood Ave 300, Boston, MA 02115, USA.  
Phone: +16179196123  
e-mail: ivan.zanoni@childrens.harvard.edu

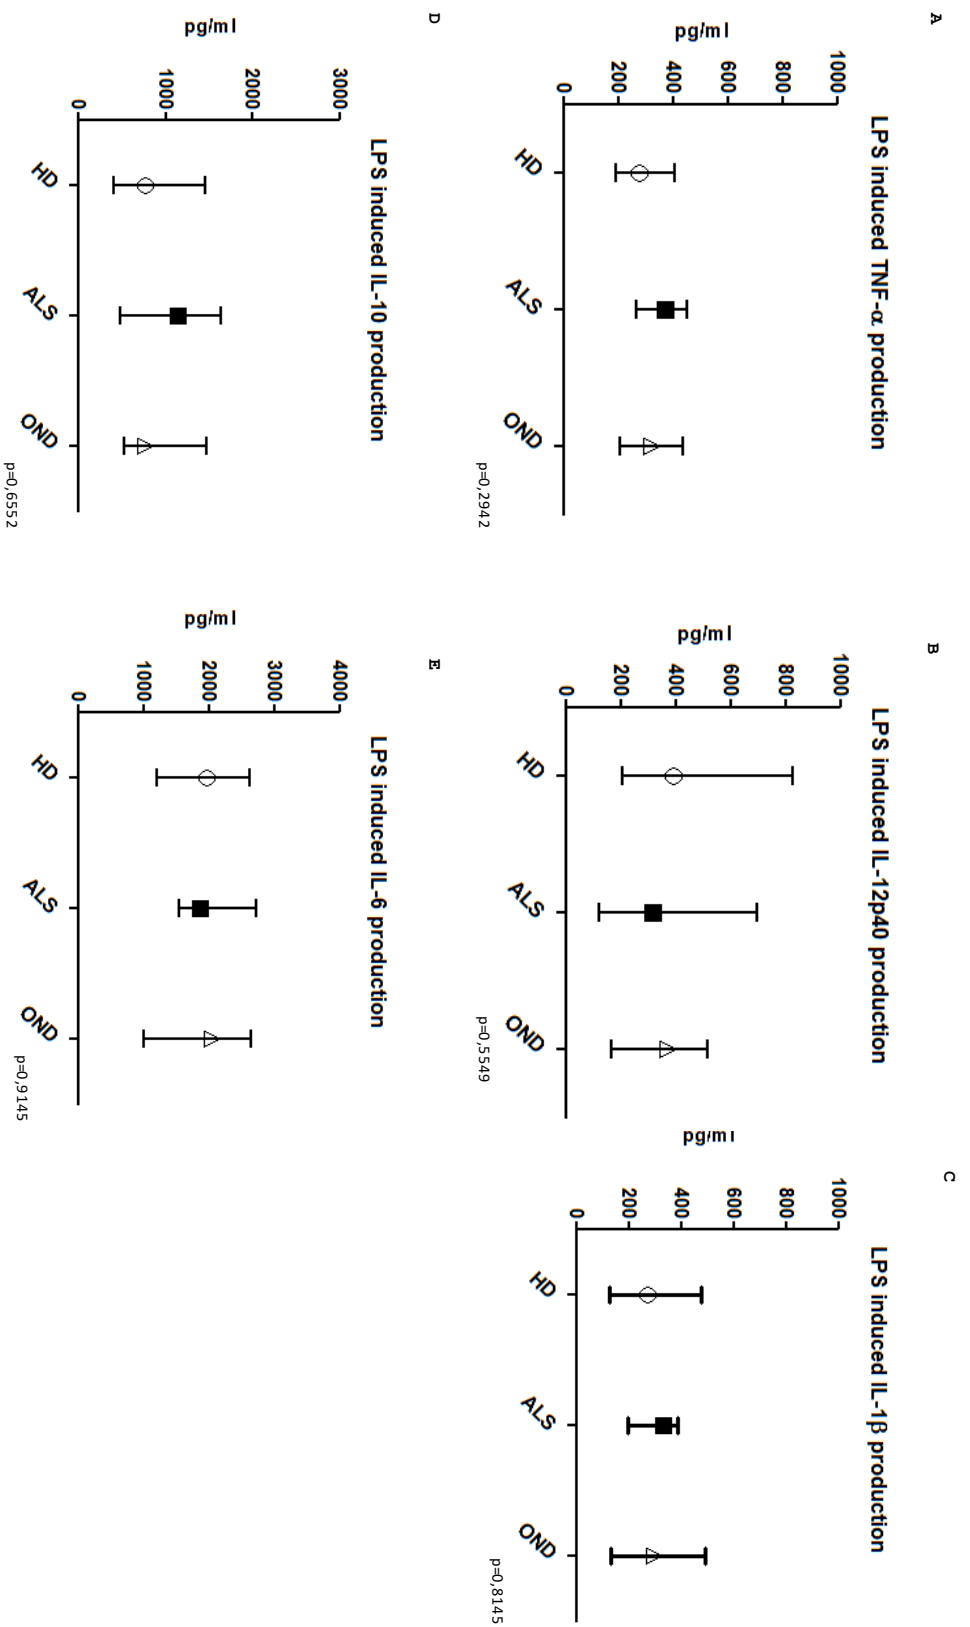

**Supplementary Figure 1.** (A-E) Efficiency of the indicated cytokine production by DCS from high IL-8 producer ALS patients after LPS treatment.

**Supplementary Table 1 ALS patients for flow cytometry analysis**

|        | Sex | Date Of Birthday | Onset      | Type of Onset | Diagnosis  | Progression Index | El Escorial | ALSFRS/48 | ALSFRS Bulbar | ALSFRS Respiratory |
|--------|-----|------------------|------------|---------------|------------|-------------------|-------------|-----------|---------------|--------------------|
| ALS100 | M   | 16/09/1949       | 01/10/2013 | Spinal        | 30/01/2014 | 1,29              | Probable    | 36        | 9             | 11                 |
| ALS101 | M   | 28/04/1947       | 01/01/2014 | Spinal        | 01/06/2014 | 0,84              | Probable    | 20        | 8             | 6                  |
| ALS102 | M   | 03/03/1952       | 01/01/2005 | Spinal        | 01/10/2006 | 0,15              | Probable    | 18        | 4             | 6                  |
| ALS103 | M   | 14/01/1944       | 01/09/2010 | Spinal        | 01/01/2012 | 0,23              | Probable    | 12        | 9             | 3                  |
| ALS104 | M   | 23/06/1971       | 01/09/2014 | Spinal        | 01/12/2014 | 1,60              | Defined     | 29        | 9             | 11                 |
| ALS105 | F   | 10/11/1962       | 01/10/2008 | Spinal        | 01/09/2009 | 0,55              | Probable    | 45        | 11            | 12                 |
| ALS106 | F   | 22/02/1950       | 01/12/2014 | Spinal        | 01/05/2015 | 3,52              | Probable    | 46        | 12            | 12                 |
| ALS107 | M   | 30/01/1947       | 01/11/2013 | Bulbar        | 01/01/2014 | 0,89              | Probable    | 26        | 9             | 3                  |
| ALS108 | M   | 18/08/1953       | 01/10/2014 | Spinal        | 01/02/2015 | 1,55              | Defined     | 25        | 9             | 12                 |
| ALS109 | M   | 24/09/1963       | 01/01/1993 | Spinal        | 01/01/2009 | 0,04              | Defined     | 4         | 0             | 4                  |
| ALS110 | F   | 09/09/1947       | 01/12/2013 | Spinal        | 01/07/2014 | 1,11              | Probable    | 26        | 11            | 6                  |
| ALS111 | F   | 08/04/1941       | 01/06/2013 | Bulbar        | 01/12/2013 | 0,30              | Defined     | 9         | 1             | 6                  |
| ALS112 | M   | 25/10/1952       | 01/10/2014 | Bulbar        | 01/10/2015 | 5,10              | Probable    | 43        | 10            | 12                 |
| ALS113 | M   | 24/04/1949       | 01/01/2012 | Spinal        | 01/05/2014 | 1,13              | Probable    | 29        | 11            | 12                 |
| ALS114 | F   | 15/06/1958       | 01/01/2006 | Spinal        | 01/01/2007 | 0,07              | Defined     | 8         | 5             | 3                  |
| ALS115 | F   | 29/04/1945       | 01/01/2009 | Spinal        | 01/06/2011 | 0,26              | Probable    | 16        | 6             | 10                 |
| ALS116 | M   | 18/10/1952       | 01/01/2012 | Spinal        | 01/10/2013 | 0,36              | Defined     | 12        | 4             | 6                  |
| ALS117 | M   | 20/10/1965       | 01/09/2015 | Spinal        | 01/12/2015 | 6,43              | Probable    | 42        | 10            | 12                 |
| ALS118 | M   | 20/07/1943       | 01/06/2008 | Spinal        | 01/10/2010 | 0,24              | Probable    | 17        | 9             | 3                  |
| ALS119 | M   | 24/06/1947       | 01/08/2015 | Spinal        | 01/06/2016 | 35,56             | Probable    | 32        | 12            | 12                 |

**Supplementary Table 2 HD for flow cytometry analysis**

|       | sex | Date of Birthday |
|-------|-----|------------------|
| HD100 | F   | 08/09/1960       |
| HD101 | F   | 15/05/1949       |
| HD102 | M   | 01/05/1950       |
| HD103 | F   | 27/07/1955       |
| HD104 | F   | 26/03/1950       |
| HD105 | F   | 02/03/1960       |
| HD106 | M   | 10/02/1959       |
| HD107 | F   | 15/05/1976       |
| HD108 | M   | 22/03/1983       |
| HD109 | F   | 03/02/1958       |

**Supplementary Table 3. ALS patients for cytokine production analysis**

|       | Sex | Date Of Birthday | Onset      | Type of Onset | Diagnosis  | Progression index | EI Escorial | ALSFRS/48 | ALSFRS Bulbar | ALSFRS Respiratory |
|-------|-----|------------------|------------|---------------|------------|-------------------|-------------|-----------|---------------|--------------------|
| ALS1  | F   | 28/10/1931       | 01/09/2014 | Bulbar        | 01/03/2015 | 17,73             | Probable    | 26        | 4             | 7                  |
| ALS2  | M   | 23/12/1938       | 01/09/2014 | Spinal        | 01/03/2015 | 21,14             | Defined     | 31        | 6             | 12                 |
| ALS3  | M   | 18/02/1953       | 01/09/2014 | Spinal        | 01/03/2015 | 18,10             | Defined     | 35        | 12            | 12                 |
| ALS4  | F   | 17/12/1956       | 01/04/2013 | Bulbar        | 01/04/2014 | 2,29              | Defined     | 30        | 6             | 7                  |
| ALS5  | M   | 18/10/1934       | 01/01/2014 | Bulbar        | 01/10/2014 | 2,29              | Probable    | 16        | 5             | 3                  |
| ALS7  | F   | 26/02/1944       | 01/06/2013 | Bulbar        | 01/02/2014 | 0,58              | Defined     | 9         | 1             | 5                  |
| ALS8  | F   | 19/02/1953       | 01/06/2014 | Bulbar        | 01/02/2015 | 12,06             | Probable    | 43        | 9             | 12                 |
| ALS9  | M   | 09/03/1939       | 01/03/2014 | Spinal        | 01/11/2014 | 5,24              | Probable    | 36        | 11            | 11                 |
| ALS10 | F   | 23/03/1948       | 01/05/2013 | Spinal        | 01/01/2014 | 0,71              | Probable    | 12        | 5             | 7                  |
| ALS11 | F   | 08/04/1941       | 01/06/2013 | Bulbar        | 01/01/2014 | 1,29              | Probable    | 22        | 3             | 6                  |
| ALS12 | F   | 16/03/1938       | 01/12/2013 | Bulbar        | 01/06/2014 | 1,55              | Probable    | 20        | 5             | 6                  |
| ALS13 | F   | 03/07/1954       | 01/12/2013 | Bulbar        | 01/10/2014 | 2,71              | Defined     | 24        | 5             | 5                  |
| ALS14 | M   | 25/09/1953       | 01/01/2015 | Bulbar        | 01/05/2015 | 21,00             | Probable    | 42        | 10            | 11                 |
| ALS15 | M   | 05/09/1972       | 01/09/2013 | Bulbar        | 01/06/2014 | 3,02              | Defined     | 40        | 10            | 12                 |
| ALS16 | F   | 15/01/1957       | 01/07/2014 | Bulbar        | 01/12/2014 | 3,15              | Defined     | 23        | 4             | 10                 |
| ALS17 | M   | 06/03/1952       | 01/09/2013 | Bulbar        | 01/09/2014 | 3,10              | Defined     | 32        | 8             | 6                  |
| ALS22 | M   | 13/11/1941       | 01/07/2013 | Respiratory   | 01/10/2014 | 3,07              | Probable    | 31        | 6             | 7                  |
| ALS24 | F   | 04/05/1939       | 01/01/2014 | Bulbar        | 01/01/2015 | 2,65              | Probable    | 23        | 5             | 6                  |
| ALS27 | F   | 01/07/1966       | 01/05/2014 | Spinal        | 01/11/2014 | 3,28              | Defined     | 37        | 9             | 12                 |
| ALS28 | F   | 19/02/1962       | 01/03/2014 | Spinal        | 26/10/2014 | 3,20              | Defined     | 37        | 12            | 12                 |
| ALS29 | M   | 08/07/1954       | 01/08/2014 | Spinal        | 01/04/2015 | 4,42              | Defined     | 28        | 9             | 12                 |
| ALS30 | M   | 16/12/1940       | 01/06/2014 | Bulbar        | 01/02/2015 | 4,61              | Defined     | 39        | 9             | 9                  |
| ALS31 | F   | 10/01/1942       | 01/07/2014 | Bulbar        | 01/04/2015 | 4,31              | Defined     | 28        | 6             | 6                  |
| ALS32 | M   | 20/08/1967       | 01/12/2013 | Spinal        | 01/01/2014 | 1,48              | Probable    | 32        | 12            | 12                 |
| ALS33 | F   | 30/04/1949       | 01/02/2015 | Spinal        | 01/07/2015 | 10,37             | Probable    | 37        | 12            | 11                 |
| ALS34 | F   | 06/01/1947       | 01/06/2014 | Spinal        | 01/07/2015 | 9,00              | Defined     | 33        | 9             | 12                 |
| ALS35 | M   | 07/11/1950       | 01/10/2013 | Spinal        | 01/01/2014 | 1,63              | Probable    | 36        | 10            | 11                 |
| ALS37 | M   | 23/02/1940       | 01/05/2014 | Bulbar        | 01/05/2015 | 3,25              | Defined     | 22        | 6             | 3                  |
| ALS40 | F   | 03/07/1973       | 01/02/2014 | Spinal        | 01/07/2014 | 2,38              | Defined     | 41        | 12            | 12                 |
| ALS41 | M   | 20/08/1967       | 01/05/2015 | Spinal        | 01/07/2015 | 6,32              | Defined     | 32        | 11            | 12                 |
| ALS42 | M   | 26/03/1943       | 01/12/2014 | Spinal        | 01/06/2015 | 1,95              | Probable    | 12        | 9             | 1                  |
| ALS43 | M   | 06/03/1970       | 01/03/2013 | Spinal        | 01/10/2013 | 1,51              | Probable    | 40        | 12            | 11                 |
| ALS46 | M   | 23/06/1971       | 01/12/2013 | Spinal        | 01/12/2014 | 2,28              | Defined     | 29        | 11            | 10                 |
| ALS47 | M   | 16/10/1952       | 01/03/2015 | Spinal        | 01/04/2015 | 1,37              | Probable    | 14        | 11            | 1                  |
| ALS48 | M   | 28/04/1966       | 01/04/2015 | Spinal        | 01/11/2015 | 12,81             | Defined     | 41        | 11            | 12                 |
| ALS49 | M   | 31/10/1950       | 01/11/2014 | Spinal        | 01/07/2015 | 1,59              | Defined     | 12        | 8             | 3                  |
| ALS50 | F   | 18/02/1944       | 01/03/2015 | Bulbar        | 01/08/2015 | 5,69              | Defined     | 37        | 8             | 10                 |
| ALS51 | M   | 09/08/1956       | 01/12/2014 | Spinal        | 01/07/2015 | 4,43              | Probable    | 34        | 11            | 12                 |
| ALS52 | M   | 24/06/1954       | 01/12/2014 | Spinal        | 01/04/2015 | 3,84              | Probable    | 42        | 12            | 12                 |

**Supplementary Table 4. HD for cytokine production analysis**

|      | <b>Sex</b> | <b>Date Of Birthday</b> |
|------|------------|-------------------------|
| HD1  | F          | 2/26/1944               |
| HD2  | M          | 8/8/1946                |
| HD3  | F          | 7/2/1951                |
| HD 4 | F          | 11/9/1940               |
| HD5  | F          | 9/19/1956               |
| HD6  | M          | 11/1/1939               |
| HD7  | F          | 12/3/1956               |
| HD8  | F          | 6/17/1949               |
| HD9  | M          | 10/10/1949              |
| HD10 | F          | 5/11/1971               |
| HD11 | F          | 11/22/1957              |
| HD12 | M          | 1/25/1967               |
| HD13 | F          | 10/23/1956              |
| HD14 | F          | 8/20/1963               |
| HD15 | M          | 7/26/1965               |
| HD16 | F          | 5/8/1956                |
| HD17 | F          | 12/2/1964               |
| HD18 | M          | 3/30/1968               |
| HD19 | F          | 8/21/1953               |
| HD20 | F          | 7/12/1956               |
| HD21 | M          | 2/23/1958               |
| HD22 | F          | 11/11/1971              |
| HD23 | F          | 7/10/1956               |
| HD24 | F          | 2/6/1960                |
| HD25 | F          | 4/24/1943               |
| HD26 | F          | 6/14/1979               |
| HD27 | F          | 12/28/1981              |
| HD28 | M          | 9/21/1942               |
| HD29 | F          | 3/7/1950                |
| HD30 | M          | 4/15/1950               |
| HD31 | M          | 12/13/1961              |
| HD32 | M          | 5/11/1973               |
| HD33 | F          | 4/18/1953               |
| HD34 | F          | 12/17/1955              |
| HD35 | F          | 4/18/1981               |
| HD36 | M          | 12/16/1947              |
| HD37 | F          | 7/27/1955               |

**Supplementary Table 5. OND for cytokine production analysis**

|       | <b>Sex</b> | <b>Date of Birthday</b> | <b>Disease</b>                              |
|-------|------------|-------------------------|---------------------------------------------|
| OND1  | F          | 7/16/1971               | TARLOV CYST                                 |
| OND2  | F          | 9/5/1959                | TARLOV CYST                                 |
| OND3  | F          | 8/29/1962               | TARLOV CYST                                 |
| OND4  | M          | 7/29/1966               | STRUMPEL – LORRAIN DISEASE                  |
| OND5  | F          | 5/18/1937               | PERIPHERAL POLYNEUROPHATY                   |
| OND6  | M          | 11/4/1969               | DUCHENNE MUSCULAR DYSTROPHY                 |
| OND7  | F          | 6/3/1948                | MYTOCHONDRIAL MYOPATHY                      |
| OND8  | F          | 8/17/1973               | MYOTONIC DYSTROPHY TYPE I                   |
| OND9  | F          | 1/13/1969               | MYOTONIC DYSTROPHY TYPE I                   |
| OND10 | M          | 7/23/1978               | MYOTONIC DYSTROPHY TYPE I                   |
| OND11 | F          | 1/3/1979                | FASCIOSCAPIULOHUMERAL MUSCULAR<br>DYSTROPHY |
| OND12 | M          | 2/25/1967               | MYOTONIC DYSTROPHY TYPE II                  |
| OND13 | M          | 7/29/1973               | MYOTONIC DYSTROPHY TYPE I                   |
| OND14 | F          | 7/12/1962               | MYOTONIC DYSTROPHY TYPE II                  |
| OND15 | M          | 1/15/1966               | MYOTONIC DYSTROPHY TYPE I                   |
| OND16 | F          | 3/15/1956               | TARLOV CYST                                 |
| OND17 | M          | 4/24/1970               | MYOTONIC DYSTROPHY TYPE I                   |
| OND18 | M          | 7/6/1982                | MYOTONIC DYSTROPHY TYPE II                  |
| OND19 | M          | 3/3/1978                | MYOTONIC DYSTROPHY TYPE I                   |
| OND20 | F          | 11/11/1975              | FASCIOSCAPIULOHUMERAL MUSCULAR<br>DYSTROPHY |
| OND21 | F          | 6/2/1955                | MYOTONIC DYSTROPHY TYPE I                   |
| OND22 | M          | 1/14/1971               | MYOTONIC DYSTROPHY TYPE I                   |
| OND23 | M          | 11/5/1949               | TARLOV CYST                                 |
| OND24 | M          | 6/3/1949                | MYOTONIC DYSTROPHY TYPE I                   |
| OND25 | F          | 10/26/1963              | MYOTONIC DYSTROPHY                          |

**Supplementary Table 6. ALS patients high IL-8 producers**

|       | sex | Date Of Birthday | Onset      | Type of onset | Diagnosis  | Progression index | EI Escorial | ALSFRS/48 | ALSFRS Bulbar | ALSFRS Respiratory |
|-------|-----|------------------|------------|---------------|------------|-------------------|-------------|-----------|---------------|--------------------|
| ALS18 | F   | 30/08/1944       | 01/07/2013 | Spinal        | 01/12/2014 | 5,39              | Probable    | 43        | 12            | 12                 |
| ALS19 | M   | 06/07/1953       | 01/10/2014 | Spinal        | 01/07/2015 | 41,11             | Probable    | 37        | 12            | 12                 |
| ALS20 | M   | 28/05/1955       | 01/11/2013 | Spinal        | 01/04/2014 | 2,47              | Probable    | 40        | 12            | 12                 |
| ALS21 | M   | 04/05/1978       | 01/05/2014 | Spinal        | 01/01/2015 | 4,27              | Probable    | 30        | 9             | 11                 |
| ALS23 | M   | 24/01/1951       | 01/12/2014 | Spinal        | 01/04/2015 | 3,18              | Probable    | 18        | 7             | 6                  |
| ALS25 | M   | 02/10/1962       | 01/04/2014 | Bulbar        | 01/11/2014 | 1,01              | Defined     | 11        | 4             | 6                  |
| ALS26 | M   | 18/08/1953       | 01/10/2014 | Spinal        | 01/02/2015 | 4,21              | Defined     | 33        | 11            | 12                 |
| ALS36 | M   | 27/02/1944       | 01/06/2014 | Spinal        | 01/11/2014 | 1,02              | Probable    | 13        | 7             | 6                  |
| ALS38 | M   | 14/03/1953       | 01/11/2014 | Spinal        | 01/05/2015 | 5,91              | Defined     | 40        | 12            | 12                 |
| ALS45 | M   | 02/09/1948       | 01/12/2013 | Spinal        | 01/07/2014 | 2,37              | Probable    | 41        | 11            | 12                 |

Supplementary Table 7

| IL-8 Univariate Analysis          |                | NT       | LPS           | LPS-NT        |
|-----------------------------------|----------------|----------|---------------|---------------|
| Gender                            | <i>rho</i>     | 0,06065  | 0,27752       | 0,25546       |
|                                   | <i>p-value</i> | 0,6957   | 0,0682        | 0,0942        |
| Site Of Onset                     | <i>rho</i>     | -0,20769 | -0,32898      | -0,28119      |
|                                   | <i>p-value</i> | 0,1761   | <b>0,0292</b> | 0,0645        |
| NIV                               | <i>rho</i>     | 0,04651  | -0,18603      | -0,253        |
|                                   | <i>p-value</i> | 0,7643   | 0,2266        | 0,0975        |
| RIG/PEG                           | <i>rho</i>     | -0,07846 | -0,20987      | -0,26479      |
|                                   | <i>p-value</i> | 0,6127   | 0,1715        | 0,0824        |
| Age                               | <i>rho</i>     | 0,02282  | -0,11315      | -0,13304      |
|                                   | <i>p-value</i> | 0,8831   | 0,4646        | 0,3893        |
| Alsfrs-r                          | <i>rho</i>     | -0,04378 | 0,14907       | 0,21516       |
|                                   | <i>p-value</i> | 0,7778   | 0,3342        | 0,1607        |
| Disease Progression               | <i>rho</i>     | 0,02192  | -0,12292      | -0,16486      |
|                                   | <i>p-value</i> | 0,8877   | 0,4267        | 0,2849        |
| Alsfrs-r Bulbar                   | <i>rho</i>     | 0,07862  | 0,2945        | 0,3019        |
|                                   | <i>p-value</i> | 0,6119   | 0,0523        | <b>0,0464</b> |
| Alsfrs-r Respiratory              | <i>rho</i>     | 0,05932  | 0,27122       | 0,30247       |
|                                   | <i>p-value</i> | 0,7021   | 0,0749        | <b>0,0460</b> |
| Time from Onset to Diagnosis      | <i>rho</i>     | -0,0486  | -0,11098      | -0,09728      |
|                                   | <i>p-value</i> | 0,7540   | 0,4733        | 0,5299        |
| Time from Onset to Evaluation     | <i>rho</i>     | 0,01692  | -0,02389      | -0,05519      |
|                                   | <i>p-value</i> | 0,9132   | 0,8777        | 0,7220        |
| Time from diagnosis to Evaluation | <i>rho</i>     | 0,01205  | -0,03545      | -0,05329      |
|                                   | <i>p-value</i> | 0,9381   | 0,8193        | 0,7312        |



**Supplementary Table 8**

| <b>CCL-2 Univariate Analysis</b>         |                | <b>NT</b> | <b>LPS</b> | <b>LPS-NT</b> |
|------------------------------------------|----------------|-----------|------------|---------------|
| <b>Gender</b>                            | <i>rho</i>     | -0,12729  | 0,05295    | 0,12705       |
|                                          | <i>p-value</i> | 0,4047    | 0,7298     | 0,4056        |
| <b>Site Of Onset</b>                     | <i>rho</i>     | 0,12649   | -0,06476   | -0,11022      |
|                                          | <i>p-value</i> | 0,4077    | 0,6726     | 0,4710        |
| <b>NIV</b>                               | <i>rho</i>     | -0,12729  | -0,17296   | -0,20823      |
|                                          | <i>p-value</i> | 0,4047    | 0,2559     | 0,1699        |
| <b>RIG/PEG</b>                           | <i>rho</i>     | 0,15553   | -0,05914   | -0,14784      |
|                                          | <i>p-value</i> | 0,3076    | 0,6995     | 0,3324        |
| <b>Age</b>                               | <i>rho</i>     | 0,01225   | -0,1557    | -0,21753      |
|                                          | <i>p-value</i> | 0,9363    | 0,3071     | 0,1512        |
| <b>Alsfrs-r</b>                          | <i>rho</i>     | 0,0729    | 0,09605    | 0,10085       |
|                                          | <i>p-value</i> | 0,6341    | 0,5303     | 0,5098        |
| <b>Disease Progression</b>               | <i>rho</i>     | -0,20007  | -0,12889   | -0,05001      |
|                                          | <i>p-value</i> | 0,1876    | 0,3988     | 0,7443        |
| <b>Alsfrs-r Bulbar</b>                   | <i>rho</i>     | 0,08795   | 0,06912    | 0,09277       |
|                                          | <i>p-value</i> | 0,5656    | 0,6519     | 0,5444        |
| <b>Alsfrs-r Respiratory</b>              | <i>rho</i>     | 0,03252   | 0,17081    | 0,18693       |
|                                          | <i>p-value</i> | 0,8321    | 0,2619     | 0,2189        |
| <b>Time from Onset to Diagnosis</b>      | <i>rho</i>     | 0,21578   | -0,17559   | -0,21036      |
|                                          | <i>p-value</i> | 0,1546    | 0,2486     | 0,1654        |
| <b>Time from Onset to Evaluation</b>     | <i>rho</i>     | 0,22125   | -0,03044   | -0,16958      |
|                                          | <i>p-value</i> | 0,1441    | 0,8426     | 0,2654        |
| <b>Time from diagnosis to Evaluation</b> | <i>rho</i>     | 0,088     | 0,08442    | -0,03018      |
|                                          | <i>p-value</i> | 0,5654    | 0,5814     | 0,8440        |

Supplementary Table 9

| TNF- $\alpha$ Univariate Analysis |                | NT            | LPS           | LPS-NT   |
|-----------------------------------|----------------|---------------|---------------|----------|
| Gender                            | <i>rho</i>     | -0,0187       | 0,00932       | -0,02796 |
|                                   | <i>p-value</i> | 0,8996        | 0,9499        | 0,8504   |
| Site Of Onset                     | <i>rho</i>     | 0,17468       | -0,0865       | -0,1577  |
|                                   | <i>p-value</i> | 0,2350        | 0,5590        | 0,2844   |
| NIV                               | <i>rho</i>     | 0,29774       | 0,20606       | -0,02306 |
|                                   | <i>p-value</i> | <b>0,0398</b> | 0,1600        | 0,8763   |
| RIG/PEG                           | <i>rho</i>     | 0,31367       | 0,31108       | 0,05742  |
|                                   | <i>p-value</i> | <b>0,0299</b> | <b>0,0314</b> | 0,6983   |
| Age                               | <i>rho</i>     | 0,15215       | 0,12124       | -0,05189 |
|                                   | <i>p-value</i> | 0,3019        | 0,4117        | 0,7261   |
| Alsfrs-r                          | <i>rho</i>     | -0,3494       | -0,1645       | 0,07367  |
|                                   | <i>p-value</i> | <b>0,0149</b> | 0,2638        | 0,6188   |
| Disease Progression               | <i>rho</i>     | 0,25059       | 0,17034       | -0,01368 |
|                                   | <i>p-value</i> | 0,0858        | 0,2471        | 0,9265   |
| Alsfrs-r Bulbar                   | <i>rho</i>     | -0,2284       | -0,0348       | 0,10715  |
|                                   | <i>p-value</i> | 0,1184        | 0,8145        | 0,4685   |
| Alsfrs-r Respiratory              | <i>rho</i>     | -0,3934       | -0,0385       | 0,20514  |
|                                   | <i>p-value</i> | <b>0,0057</b> | 0,7951        | 0,1619   |
| Time from Onset to Diagnosis      | <i>rho</i>     | 0,06583       | 0,12396       | 0,06126  |
|                                   | <i>p-value</i> | 0,6566        | 0,4012        | 0,6791   |
| Time from Onset to Evaluation     | <i>rho</i>     | 0,13599       | -0,021        | -0,05819 |
|                                   | <i>p-value</i> | 0,3567        | 0,8876        | 0,6944   |
| Time from diagnosis to Evaluation | <i>rho</i>     | 0,11027       | -0,0309       | -0,03485 |
|                                   | <i>p-value</i> | 0,4556        | 0,8347        | 0,8141   |

Supplementary Table 10

| IL-1 $\beta$ Univariate Analysis  |                | NT       | LPS           | LPS-NT   |
|-----------------------------------|----------------|----------|---------------|----------|
| Gender                            | <i>rho</i>     | 0,01553  | -0,02174      | 0,14289  |
|                                   | <i>p-value</i> | 0,9165   | 0,8834        | 0,3326   |
| Site Of Onset                     | <i>rho</i>     | 0,05141  | 0,31426       | 0,16931  |
|                                   | <i>p-value</i> | 0,7286   | <b>0,0296</b> | 0,2500   |
| NIV                               | <i>rho</i>     | 0,14302  | 0,2414        | 0,02614  |
|                                   | <i>p-value</i> | 0,3322   | 0,0983        | 0,8600   |
| RIG/PEG                           | <i>rho</i>     | 0,12444  | 0,27754       | 0,14356  |
|                                   | <i>p-value</i> | 0,3994   | 0,0561        | 0,3303   |
| Age                               | <i>rho</i>     | 0,08706  | 0,11041       | -0,03733 |
|                                   | <i>p-value</i> | 0,5563   | 0,4550        | 0,8011   |
| Alsfrs-r                          | <i>rho</i>     | 0,02243  | -0,04882      | 0,10667  |
|                                   | <i>p-value</i> | 0,8797   | 0,7418        | 0,4706   |
| Disease Progression               | <i>rho</i>     | 0,03917  | 0,16421       | 0,06943  |
|                                   | <i>p-value</i> | 0,7915   | 0,2647        | 0,6391   |
| Alsfrs-r Bulbar                   | <i>rho</i>     | -0,00052 | -0,23166      | -0,05995 |
|                                   | <i>p-value</i> | 0,9972   | 0,1131        | 0,6856   |
| Alsfrs-r Respiratory              | <i>rho</i>     | -0,05813 | -0,14179      | 0,06476  |
|                                   | <i>p-value</i> | 0,6947   | 0,3364        | 0,6619   |
| Time from Onset to Diagnosis      | <i>rho</i>     | -0,10739 | -0,04869      | -0,08536 |
|                                   | <i>p-value</i> | 0,4675   | 0,7424        | 0,5640   |
| Time from Onset to Evaluation     | <i>rho</i>     | -0,05679 | -0,20231      | -0,277   |
|                                   | <i>p-value</i> | 0,7014   | 0,1679        | 0,0567   |
| Time from diagnosis to Evaluation | <i>rho</i>     | 0,02604  | -0,16639      | -0,26046 |
|                                   | <i>p-value</i> | 0,8606   | 0,2584        | 0,0738   |

Supplementary Table 11

| IL12p40 Univariate Analysis       |                | NT       | LPS           | LPS-NT        |
|-----------------------------------|----------------|----------|---------------|---------------|
| Gender                            | <i>rho</i>     | 0,07513  | 0,17553       | 0,06036       |
|                                   | <i>p-value</i> | 0,6632   | 0,3058        | 0,7266        |
| Site Of Onset                     | <i>rho</i>     | 0,06773  | 0,08127       | 0,04065       |
|                                   | <i>p-value</i> | 0,6947   | 0,6375        | 0,8139        |
| NIV                               | <i>rho</i>     | 0,19855  | 0,49919       | 0,28372       |
|                                   | <i>p-value</i> | 0,2457   | <b>0,0019</b> | 0,0936        |
| RIG/PEG                           | <i>rho</i>     | 0,28771  | 0,50151       | 0,215         |
|                                   | <i>p-value</i> | 0,0888   | <b>0,0018</b> | 0,2079        |
| Age                               | <i>rho</i>     | -0,00458 | 0,16255       | 0,06194       |
|                                   | <i>p-value</i> | 0,9789   | 0,3435        | 0,7197        |
| Alsfrs-r                          | <i>rho</i>     | -0,07048 | -0,36607      | -0,31536      |
|                                   | <i>p-value</i> | 0,6829   | <b>0,0281</b> | 0,0610        |
| Disease Progression               | <i>rho</i>     | -0,01208 | 0,34494       | 0,35967       |
|                                   | <i>p-value</i> | 0,9442   | <b>0,0394</b> | <b>0,0312</b> |
| Alsfrs-r Bulbar                   | <i>rho</i>     | -0,05943 | -0,21595      | -0,14966      |
|                                   | <i>p-value</i> | 0,7306   | 0,2059        | 0,3837        |
| Alsfrs-r Respiratory              | <i>rho</i>     | -0,12673 | -0,28625      | -0,10109      |
|                                   | <i>p-value</i> | 0,4614   | 0,0905        | 0,5575        |
| Time from Onset to Diagnosis      | <i>rho</i>     | 0,05799  | -0,07899      | -0,00032      |
|                                   | <i>p-value</i> | 0,7369   | 0,6470        | 0,9985        |
| Time from Onset to Evaluation     | <i>rho</i>     | 0,22469  | -0,02793      | -0,18272      |
|                                   | <i>p-value</i> | 0,1877   | 0,8715        | 0,2861        |
| Time from diagnosis to Evaluation | <i>rho</i>     | 0,11625  | -0,01693      | -0,1324       |
|                                   | <i>p-value</i> | 0,4996   | 0,9219        | 0,4414        |

**Supplementary Table 12**

| <b>IL-6 Univariate Analysis</b>          |                | <b>NT</b> | <b>LPS</b> | <b>LPS-NT</b> |
|------------------------------------------|----------------|-----------|------------|---------------|
| <b>Gender</b>                            | <i>rho</i>     | 0,03886   | 0,00645    | 0,02581       |
|                                          | <i>p-value</i> | 0,7954    | 0,9657     | 0,8633        |
| <b>Site Of Onset</b>                     | <i>rho</i>     | -0,13953  | -0,04155   | -0,11826      |
|                                          | <i>p-value</i> | 0,3496    | 0,7815     | 0,4285        |
| <b>NIV</b>                               | <i>rho</i>     | 0,08905   | 0,00968    | -0,0968       |
|                                          | <i>p-value</i> | 0,5517    | 0,9485     | 0,5174        |
| <b>RIG/PEG</b>                           | <i>rho</i>     | 0,0287    | 0,16824    | 0,02355       |
|                                          | <i>p-value</i> | 0,8481    | 0,2583     | 0,8751        |
| <b>Age</b>                               | <i>rho</i>     | 0,1805    | -0,08358   | -0,11217      |
|                                          | <i>p-value</i> | 0,2247    | 0,5765     | 0,4528        |
| <b>Alsfrs-r</b>                          | <i>rho</i>     | -0,00029  | -0,04488   | 0,0351        |
|                                          | <i>p-value</i> | 0,9985    | 0,7645     | 0,8148        |
| <b>Disease Progression</b>               | <i>rho</i>     | 0,00107   | 0,08344    | 0,01139       |
|                                          | <i>p-value</i> | 0,9943    | 0,5771     | 0,9394        |
| <b>Alsfrs-r Bulbar</b>                   | <i>rho</i>     | 0,12222   | -0,04393   | -0,00356      |
|                                          | <i>p-value</i> | 0,4131    | 0,7694     | 0,9811        |
| <b>Alsfrs-r Respiratory</b>              | <i>rho</i>     | -0,02378  | 0,16525    | 0,22808       |
|                                          | <i>p-value</i> | 0,8739    | 0,2670     | 0,1231        |
| <b>Time from Onset to Diagnosis</b>      | <i>rho</i>     | 0,02894   | -0,21992   | -0,27516      |
|                                          | <i>p-value</i> | 0,8469    | 0,1375     | 0,0612        |
| <b>Time from Onset to Evaluation</b>     | <i>rho</i>     | 0,05208   | -0,07575   | -0,10437      |
|                                          | <i>p-value</i> | 0,7281    | 0,6128     | 0,4851        |
| <b>Time from diagnosis to Evaluation</b> | <i>rho</i>     | -0,01503  | 0,00202    | 0,01313       |
|                                          | <i>p-value</i> | 0,9201    | 0,9892     | 0,9302        |

**Supplementary Table 13**

|                                   |                                     |
|-----------------------------------|-------------------------------------|
| <b>IL-6 Multivariate Analysis</b> | <b>Time from Onset to Diagnosis</b> |
| <b>LPS-NT</b>                     | p=0,0468                            |
